# Supplementary material for: The effect and potential of using a temperature controlled separation column with ultra-high pressure microcapillary liquid chromatography/tandem mass spectrometry on proteomic analysis
Source: Royal Society of Chemistry journal article supplement (doi:10.1039/c0an00724b), 2011-01-01

**Supplementary Figure 1.** The number of unique sequence peptides identified from LC/MS/MS experiments at different operation temperatures. The same peptide ions having different charges were counted as one unique sequence peptide. Refer the experimental section for details of data analysis.

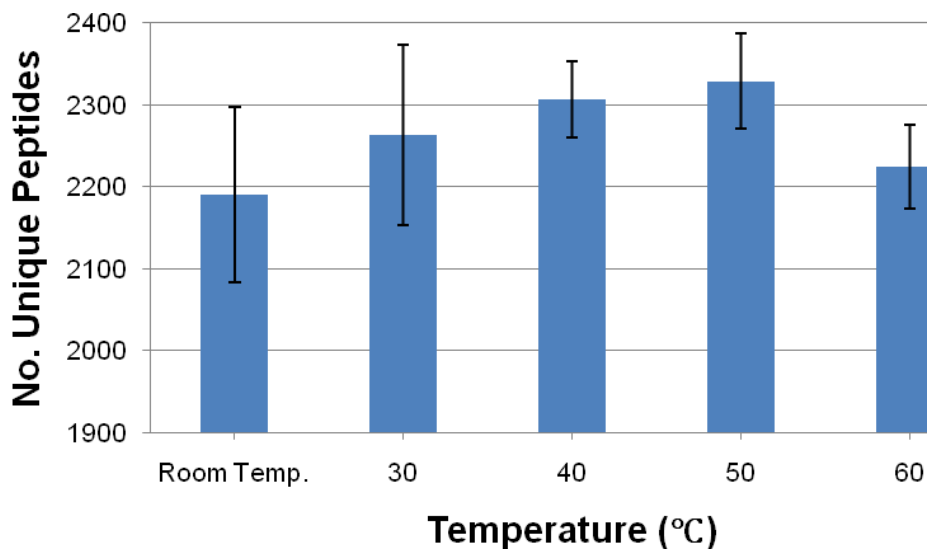

Supplement: c0an00724b.pdf [file c0an00724b.pdf]
